# Supplementary material for: Synthesis of mesoporous SiO2/Cu2O–graphene nanocomposites and their highly efficient photocatalytic performance for dye pollutants
Source: Royal Society of Chemistry journal article supplement (doi:10.1039/c7ra03526h), 2017-01-01
Supplement: c7ra03526h1.pdf [file c7ra03526h1.pdf]

## Supplementary Information

(RSC Advances - Decision on Manuscript # RA-ART-03-2017-003526)

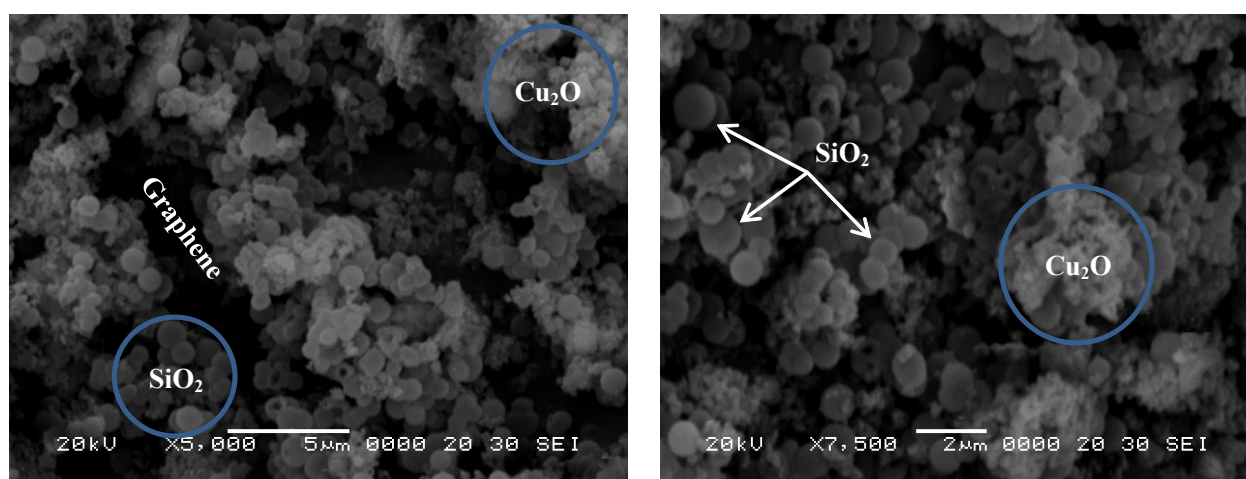

**Fig. S1.** SEM morphology of the mesoporous  $\text{SiO}_2/\text{Cu}_2\text{O}$ -graphene nanocomposite.

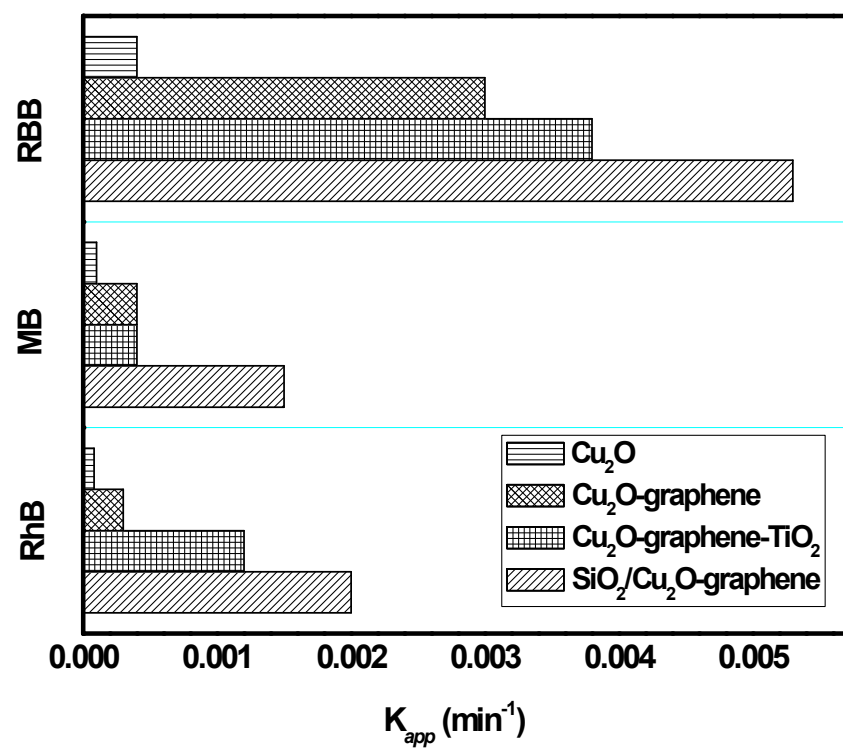

**Fig. S2.** Kinetics parameters of photocatalytic degradation of different organic dyes at different samples.

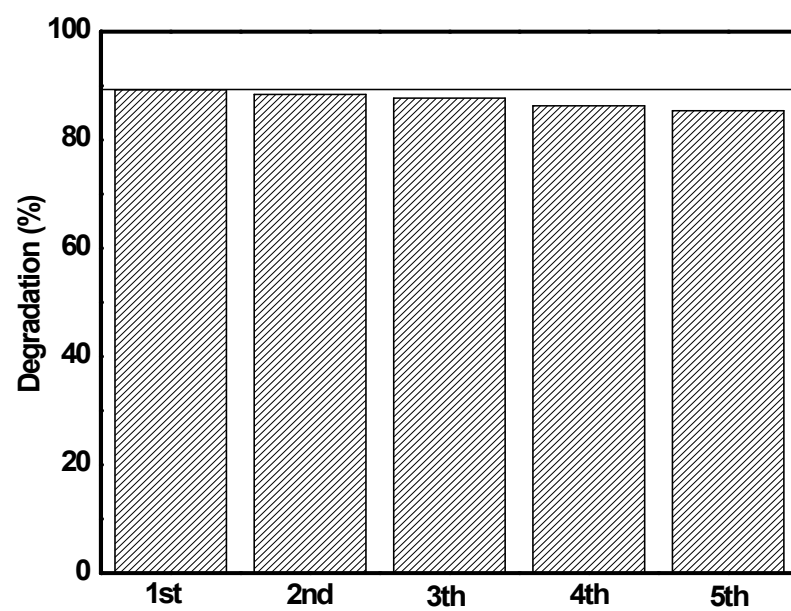

(a)

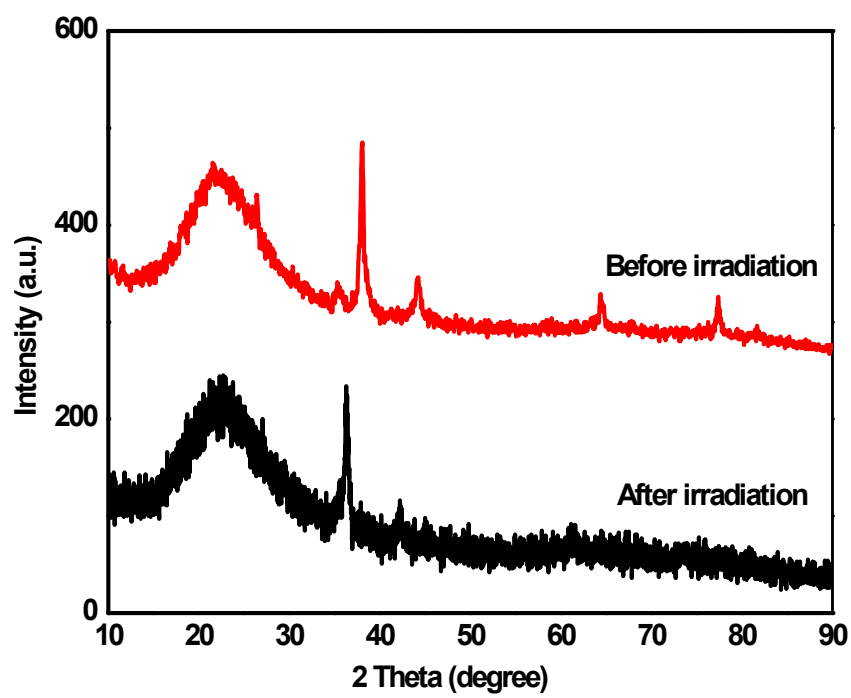

(b)

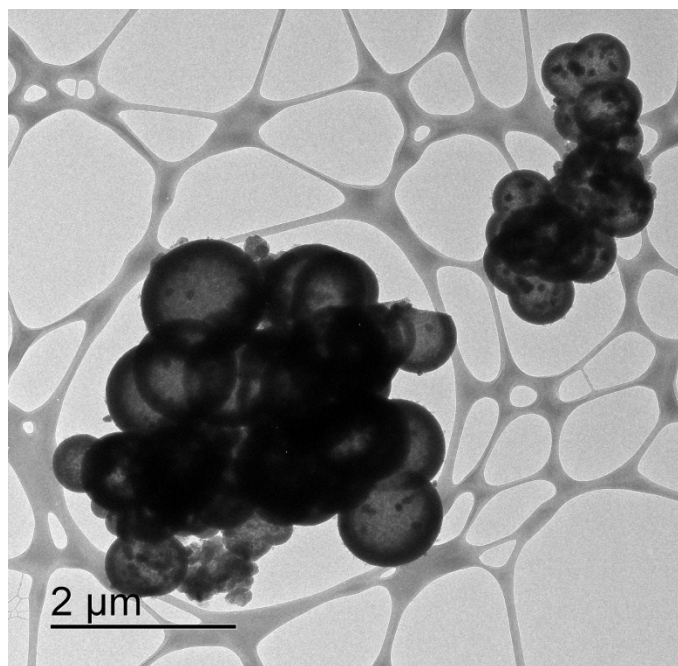

(c)

**Fig.S3.** (a) Cycling times of the photocatalytic degradation of RhB dye in the present of mesoporous  $\text{SiO}_2/\text{Cu}_2\text{O}$ -graphene under visible light; (b) XRD pattern and (c) TEM image of the mesoporous  $\text{SiO}_2/\text{Cu}_2\text{O}$ -graphene after five times repeated cycles with RBB.
